# Supplementary material
Source: PubMed Central journal article supplement (PMC6604217)

**Attenuation of Allergen, IL-13- and TGF- $\alpha$ -induced lung fibrosis following the treatment of IL-15 in mice**

Sathisha Upparahalli Venkateshaiah, PhD\* Rituraj Niranjana, PhD\*<sup>1</sup> Murli

Manohar, PhD Alok K. Verma, PHD, Hemanth K. Kandikattu, PhD Joseph A.

Lasky, MD and Anil Mishra, PhD<sup>§</sup>

ONLINE DATA SUPPLEMENT

## **Supplementary Figure Legends**

**Supplementary figure 1. Expression of profibrotic cytokines in rIL-15 treated and saline sham treated Aspergillus antigen challenged mice.** Real time PCR analysis detected reduced transcript levels of Collagen-1, Collagen-3, TGF- $\beta$ 1 and  $\alpha$ -SMA in Il-15 treated Aspergillus challenged mice compared to saline treated Aspergillus challenged mice (A-D). Data is expressed as mean  $\pm$  SD, n=12 mice/group in each group.

**Supplementary figure 2. Expression of profibrotic cytokines in no-DOX and DOX treated saline and Aspergillus antigen challenged CC10-IL-15 bitransgenic mice.** Real time PCR analysis demonstrated reduced transcript levels of Collagen-1, TGF- $\beta$ 1 and  $\alpha$ -SMA in no DOX and DOX exposed saline and Aspergillus CC10-IL-15 transgenic mice (A-D). Data is expressed as mean  $\pm$  SD, n=12 mice/group in each group.

**Supplementary figure 3. Expression of profibrotic cytokines in no-DOX and DOX treated saline and rIL-15 treated CC10-IL-13 bitransgenic mice.** Real time PCR analysis revealed reduced transcript levels of Collagen-1, TGF- $\beta$ 1 and  $\alpha$ -SMA in no DOX and DOX exposed saline and rIL-15 treated CC10-IL-13 transgenic mice (A-D). Data is expressed as mean  $\pm$  SD, n=12 mice/group in each group.

**Supplementary figure 4. Expression of profibrotic cytokines on ALT803 treated and saline Aspergillus antigen challenged mice.** Real time PCR analysis revealed reduced transcript levels of Collagen-1, Collagen-3, TGF- $\beta$ 1 and  $\alpha$ -SMA in ALT803 treated Aspergillus challenged mice compared to saline treated Aspergillus challenged mice (A-D). Data is expressed as mean  $\pm$  SD, n=12 mice/group in each group.

Supplementary Figure 1

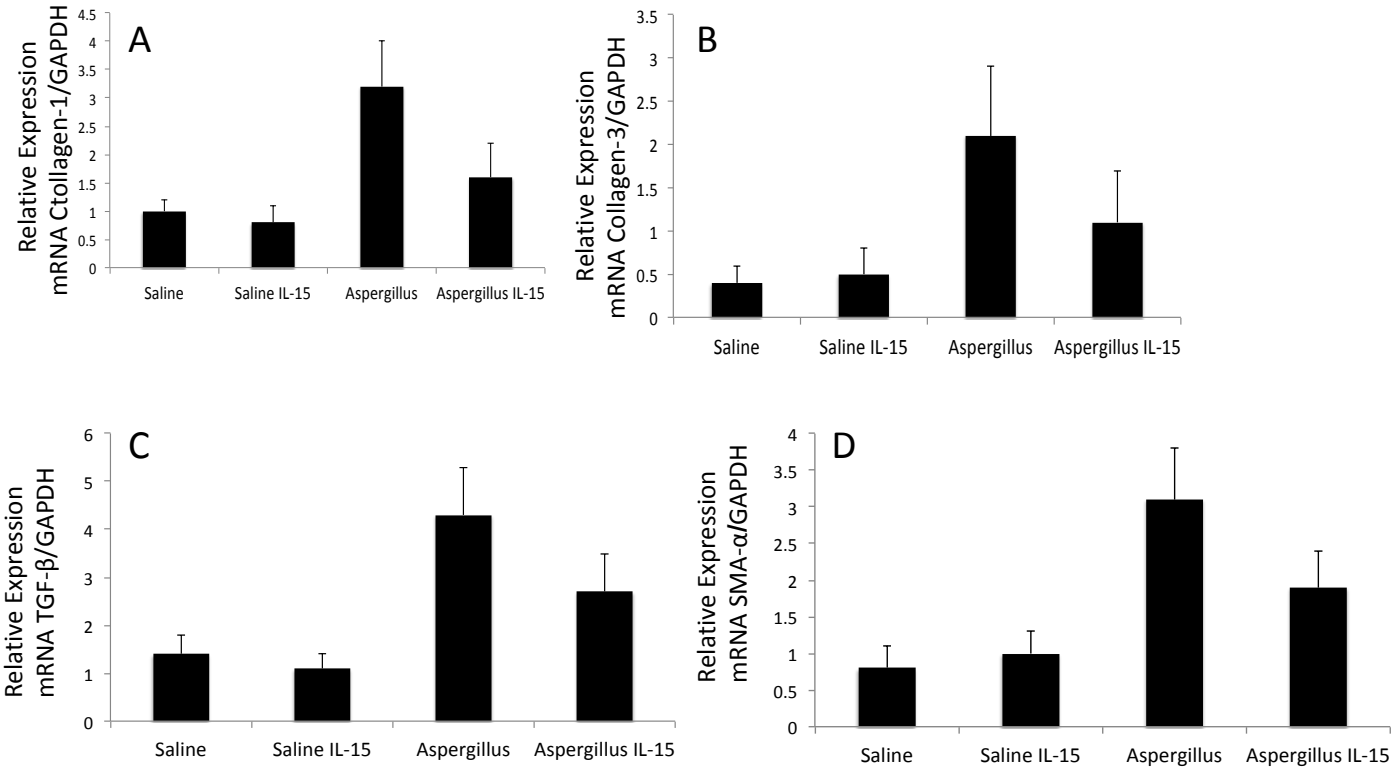

Supplementary Figure 2.

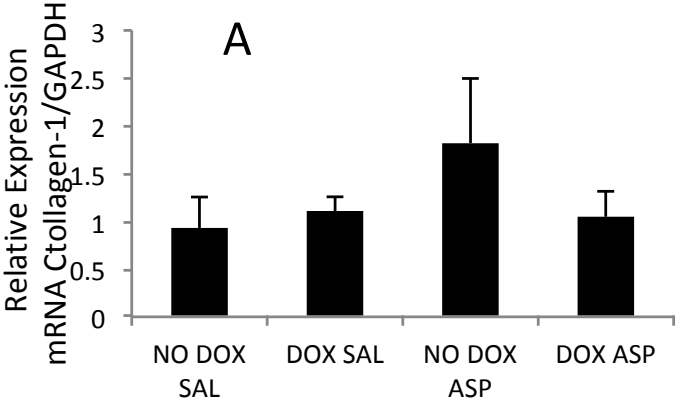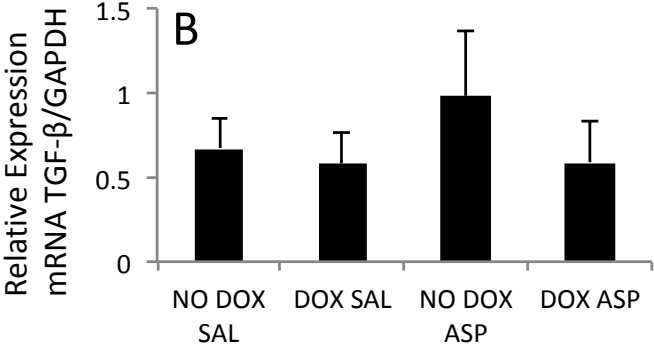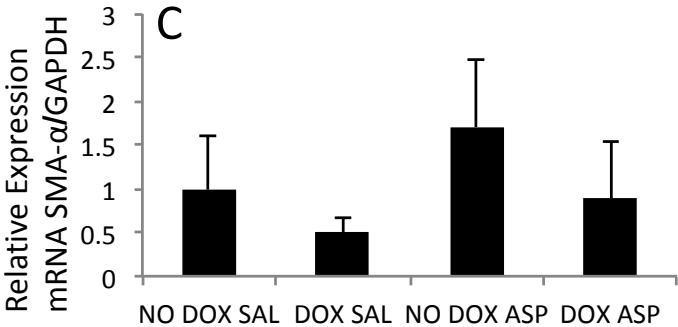

Supplementary Figure 3.

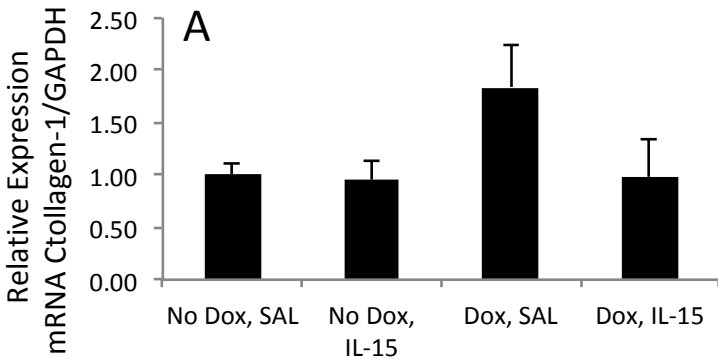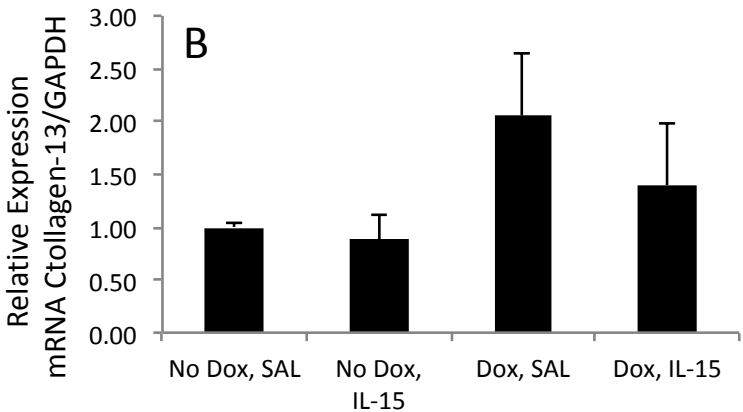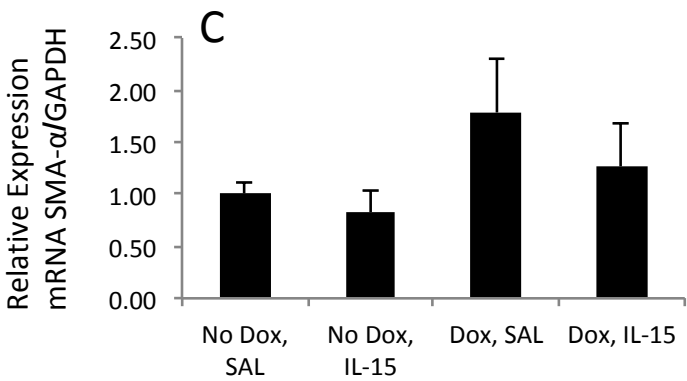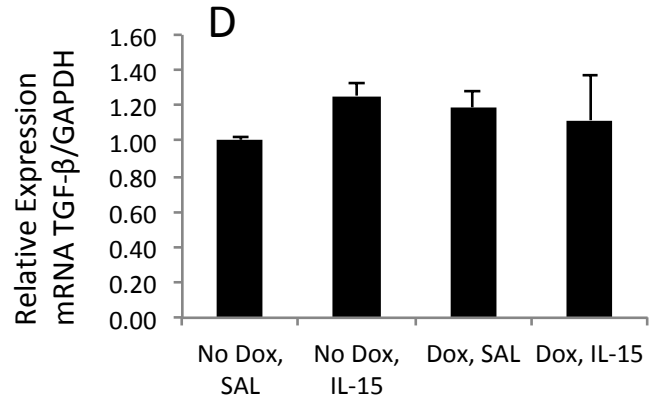

Supplementary Figure 4

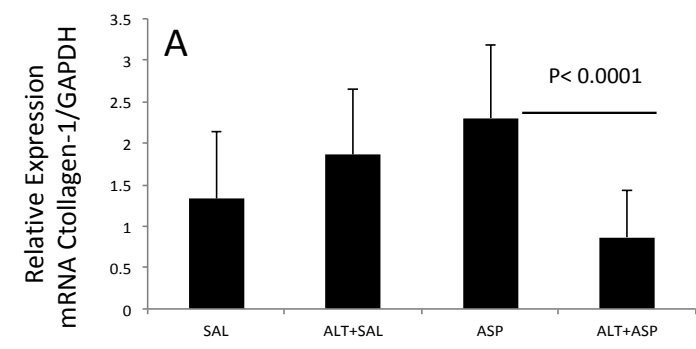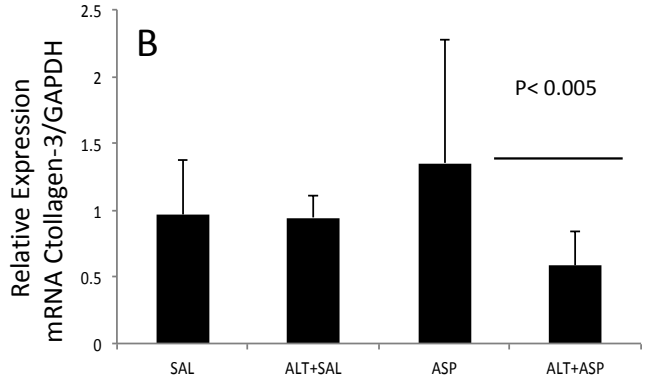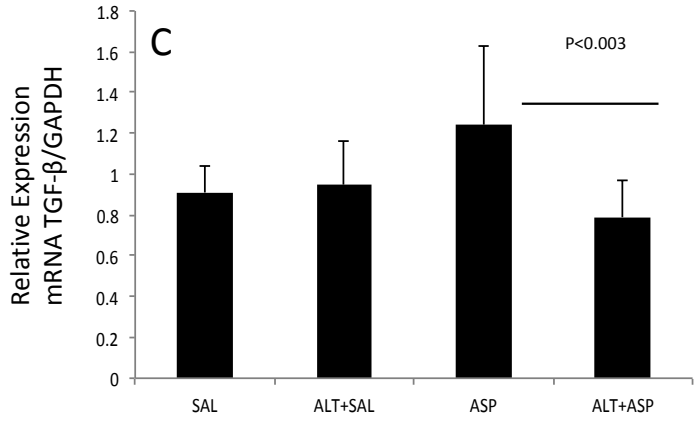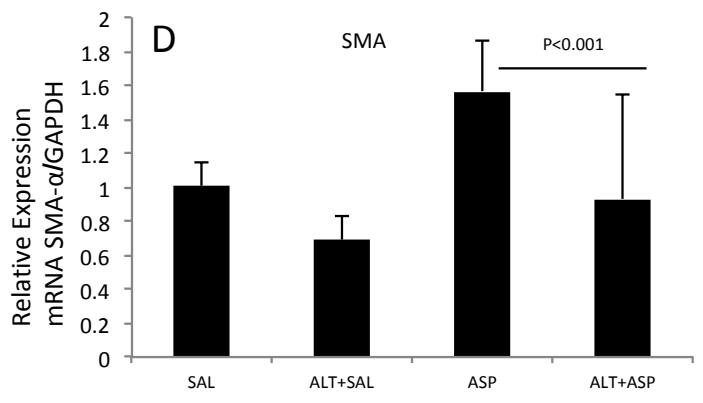

Supplement: rcmb.2018-0254OC_venkateshaiah_data_supplement.pdf [file rcmb.2018-0254OC_venkateshaiah_data_supplement.pdf]
